# Supplementary material
Source: HighWire-hosted journal article supplement (https://tsaco.smart01.highwire.org/content/9/1/e001320)
Supplement: inline-supplementary-material-4 [file inline-supplementary-material-4.pdf]

# Mixed Methods and Qualitative Research

Vanessa Ho, MD, MPH  
MetroHealth

## Disclosures:

National Center for  
Advancing Translational Science  
(KL2 TR002457)

I am NOT an expert

# I love Quantitative Science

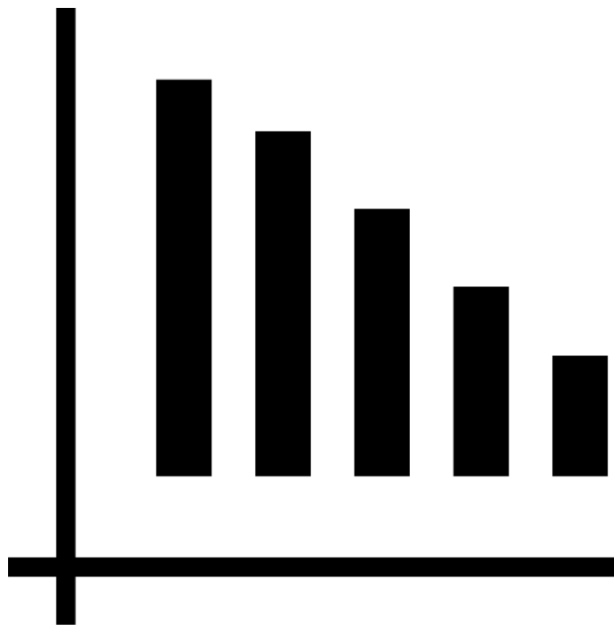

# What about the Human Element?

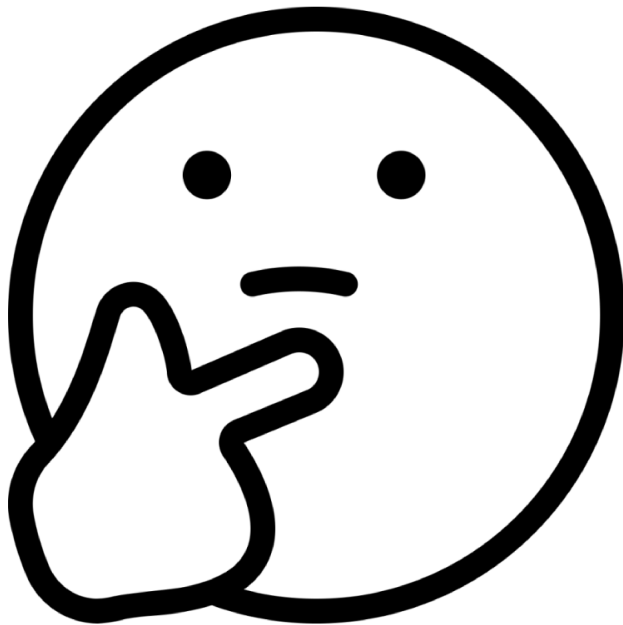

- Why did my patient walk on his Ex-Fix?
- Why don't people show up to follow-up appointments?
- Why do efficacy and effectiveness trials differ?

# Qualitative Research

Collecting and analyzing non-numerical data, such as text, video, or audio, to understand concepts, opinions, and experiences

Common data sources:

- Interviews
- Focus Groups
- Surveys

Can be used to gather in-depth insights or generate new ideas

# Mixed Methods

**Mixed Methods research** purposefully and intentionally combines quantitative and qualitative methods, designed to give you a more complete picture than a standalone quantitative or qualitative study

- Require teams with diverse methodological training
- Mixing of the data must be purposeful
- Interpretation depends on how the study is performed

# 4 Common Approaches

- Triangular
- Exploratory\*
- Explanatory\*
- Embedded/Nested

\*named for the qualitative component

# Triangular Design

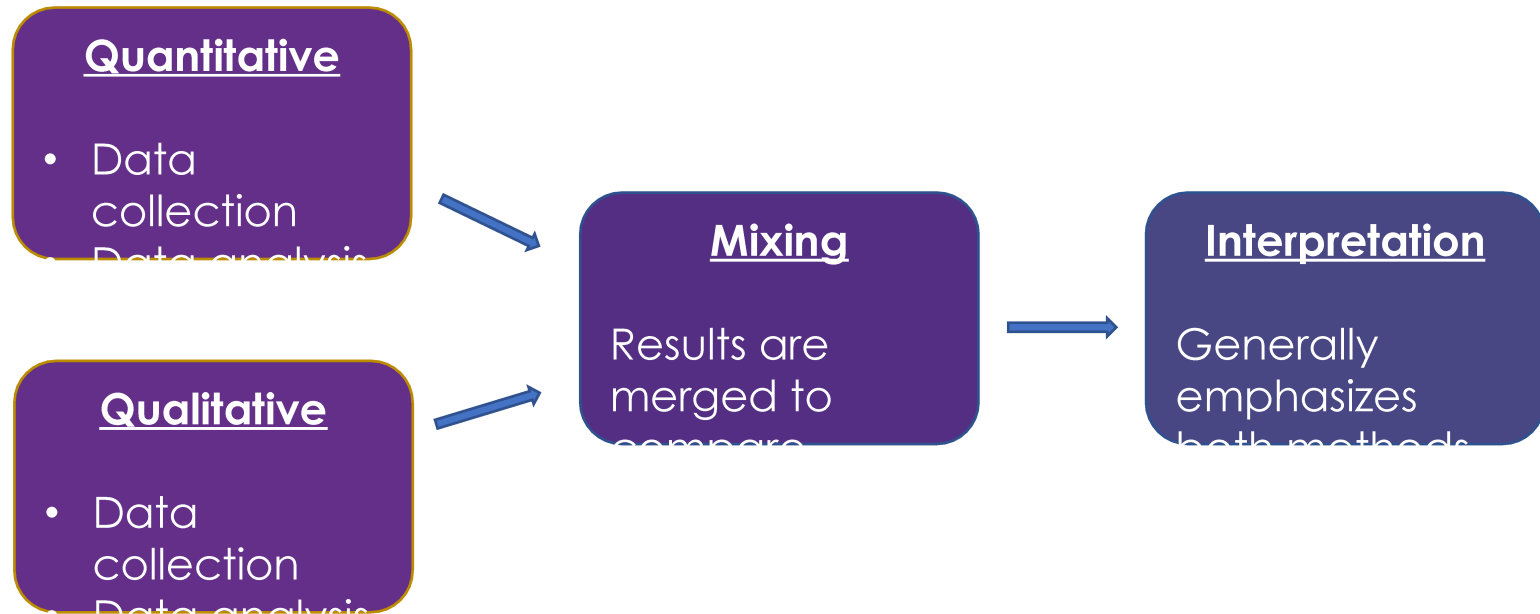



# Exploratory Design

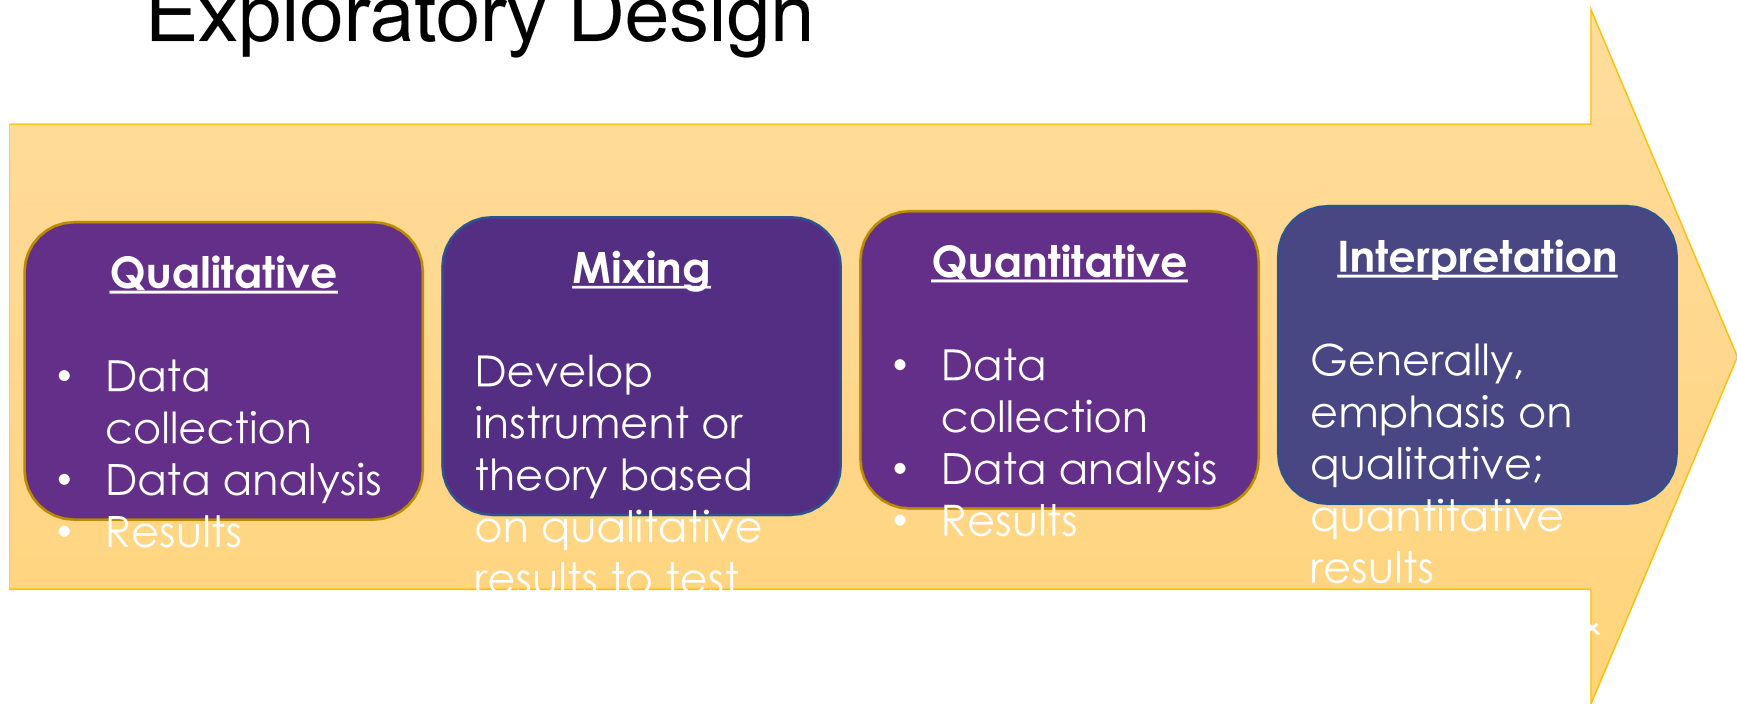

# Explanatory Design

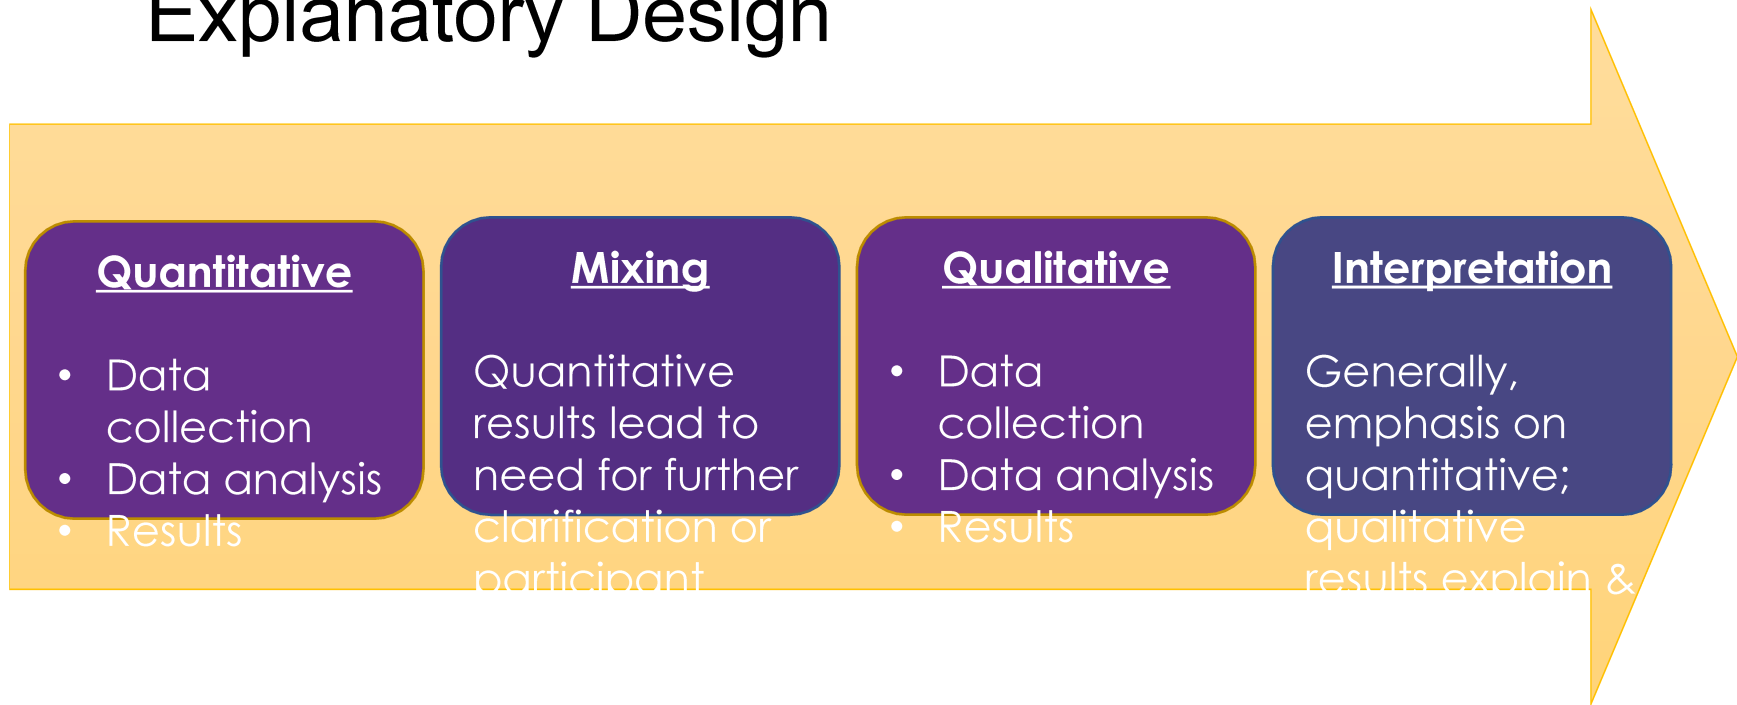

# Embedded Design

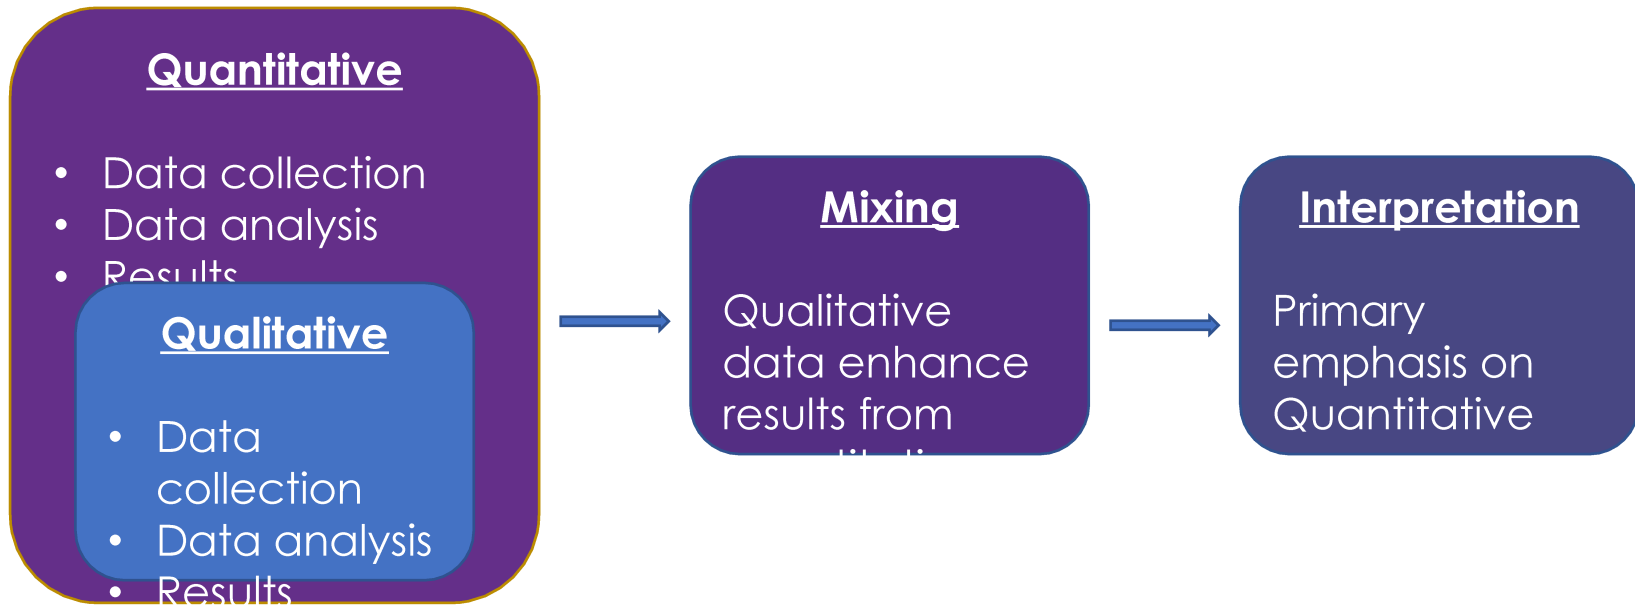

# When to Use Mixed Methods

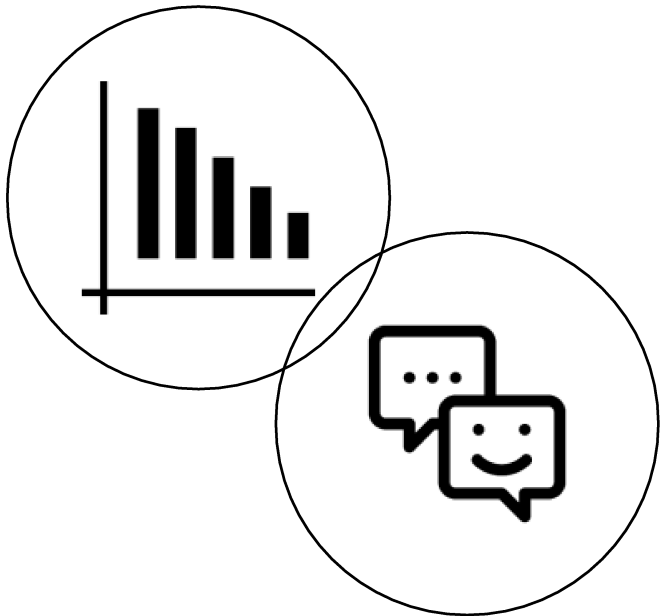

Strengths and weaknesses of methods complement each other

- **Contextualization**
  - Can uncover dissonant data and explain discrepancies
- **Credibility**
  - Enhance the validity of findings by obtaining similar results
- **Generalizability**
  - Quantitative will be more externally valid, qualitative usually with a smaller sample size
